# Supplementary material for: Resource recovery of wastewater treatment sludge: synthesis of a magnetic cancrinite adsorbent
Source: Royal Society of Chemistry journal article supplement (doi:10.1039/c9ra06940b), 2019-01-01
Supplement: c9ra06940b1.pdf [file c9ra06940b1.pdf]

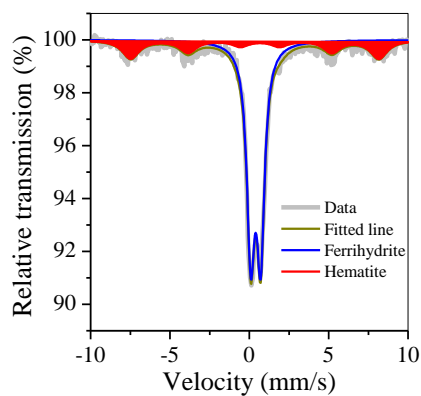

Fig. S1 Room-temperature Mössbauer spectrum of the sludge

Table S1 Mössbauer parameters of the sludge

| Sample         | Crystalline phase | IS <sup>a</sup><br>(mm/s) | Qs <sup>b</sup><br>(mm/s) | Hhf<br>(KOe) | Ratio <sup>c</sup><br>(%) |
|----------------|-------------------|---------------------------|---------------------------|--------------|---------------------------|
| Iron<br>sludge | Ferrihydrite      | 0.33±0                    | 0.65±0                    |              | 71.1                      |
|                | Hematite          | 0.36±0.04                 | 0.16±0.07                 | 510.3±2      | 28.9                      |

<sup>a</sup> IS, isomer shift, related to  $\alpha$ -Fe.

<sup>b</sup> Qs, electric quadrupole splitting.

<sup>c</sup> Ratio, spectral area ratio.
